# Supplementary material
Source: PubMed Central journal article supplement (PMC2867486)
Supplement: NIHMS161832-supplement-1_si_001.pdf [file NIHMS161832-supplement-1_si_001.pdf]

## Supporting Information

### A General Strategy to Prepare TiO<sub>2</sub>-core Gold-shell Nanoparticles as SERS-tags

Wenbing Li, Yanyan Guo and Peng Zhang\*

*Department of Chemistry, New Mexico Tech, Socorro, New Mexico 87801*

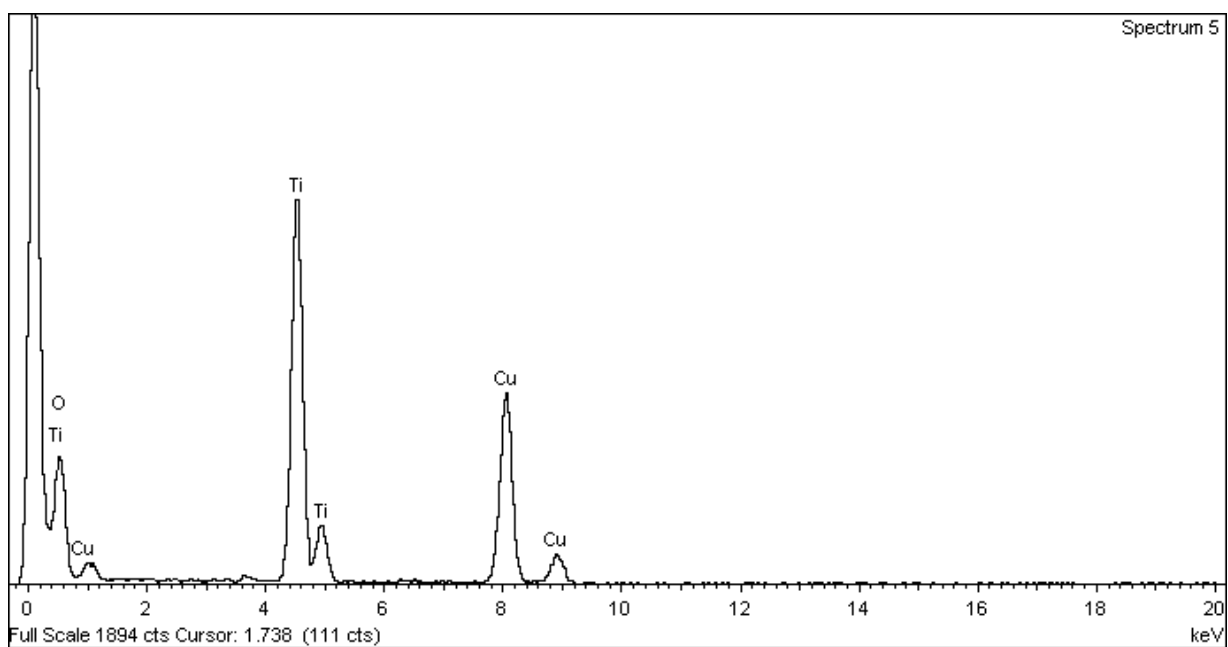

(a)

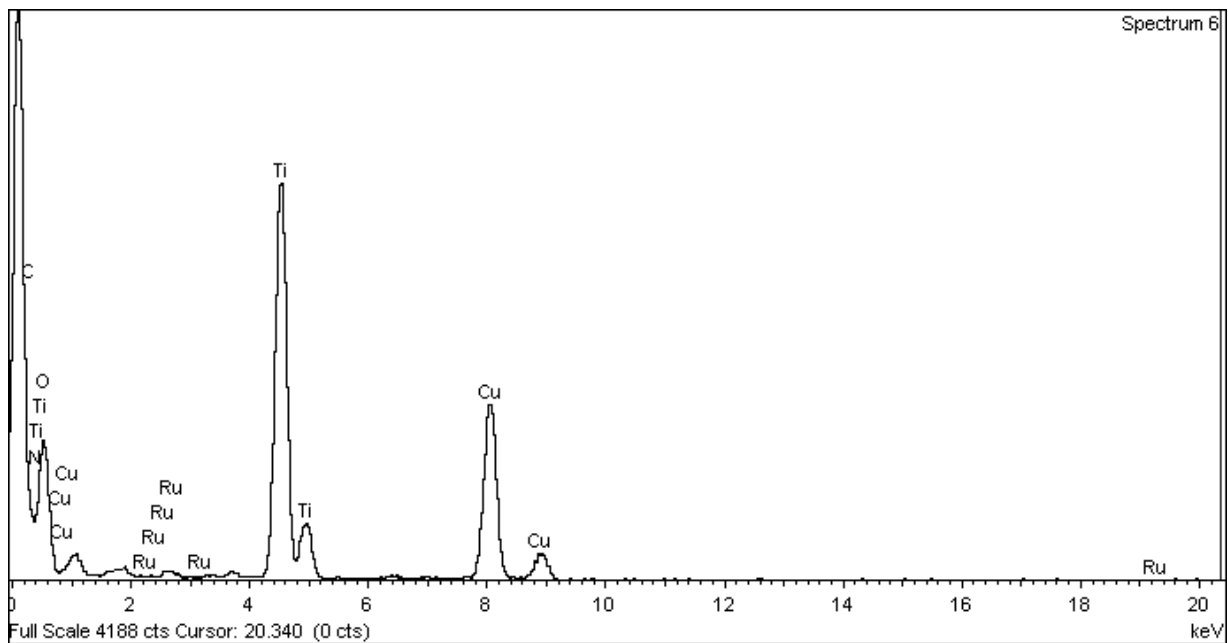

(b)

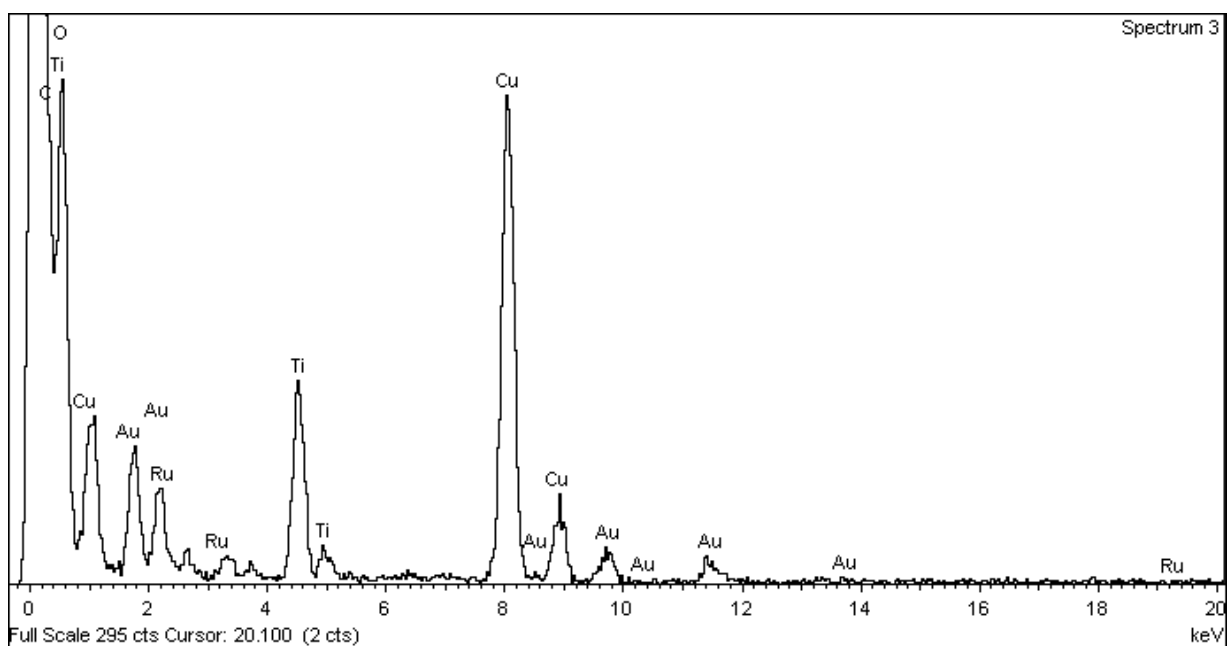

(c)

**Figure S1.** EDX spectra of (a) TiO<sub>2</sub>, (b) TiO<sub>2</sub>-Ru(bpy) and (c) Au-TiO<sub>2</sub>-Ru(bpy). Cu peaks are due to the TEM grid.
